# Supplementary material for: Molecular interactions with CO2 for controlling the regioselectivity of liquid phase hydrogenation of 2,4-dinitroaniline
Source: Royal Society of Chemistry journal article supplement (doi:10.1039/c4cp02114b), 2014-01-01
Supplement: c4cp02114b1.pdf [file c4cp02114b1.pdf]

## Supporting Information

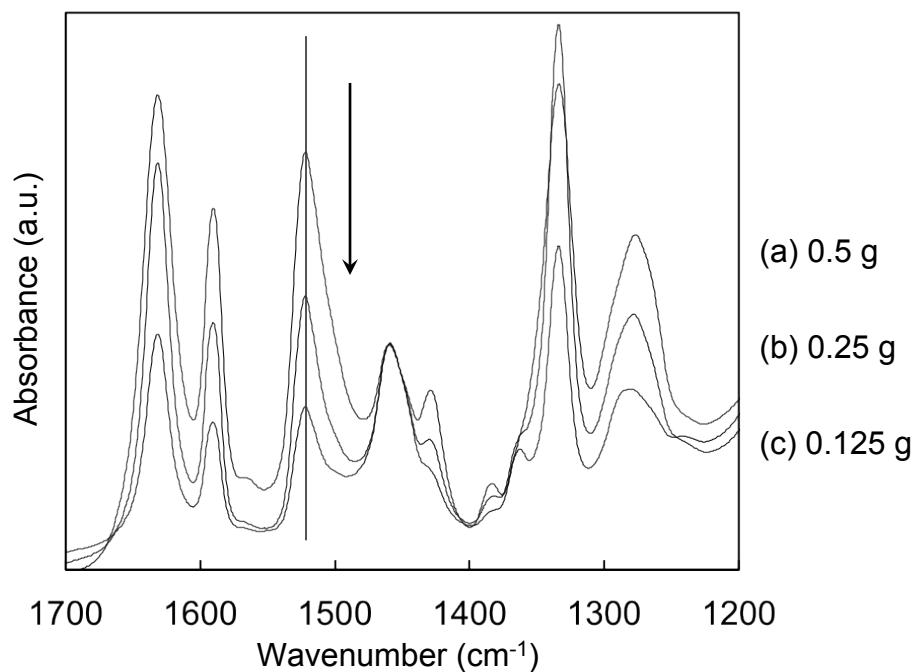

**Figure S1.** FTIR spectra in the range of  $\nu(\text{NO}_2)$  for 2,4-dinitroaniline **1** dissolved in THF in different concentrations at room temperature. A certain weight of **1** given was mixed with  $10 \text{ cm}^3$  THF for FTIR measurements.

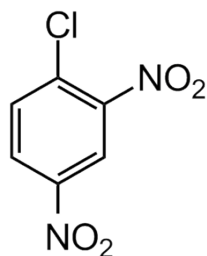

**5:** Chloro-2,4-dinitrobenzene

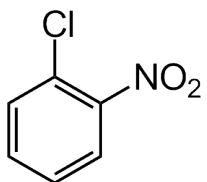

2CNB: 2-Chloronitrobenzene

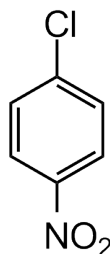

4CNB: 4-Chloronitrobenzene

**Scheme S1.** Chlorodinitro and mononitro substrates used for FTIR measurements.

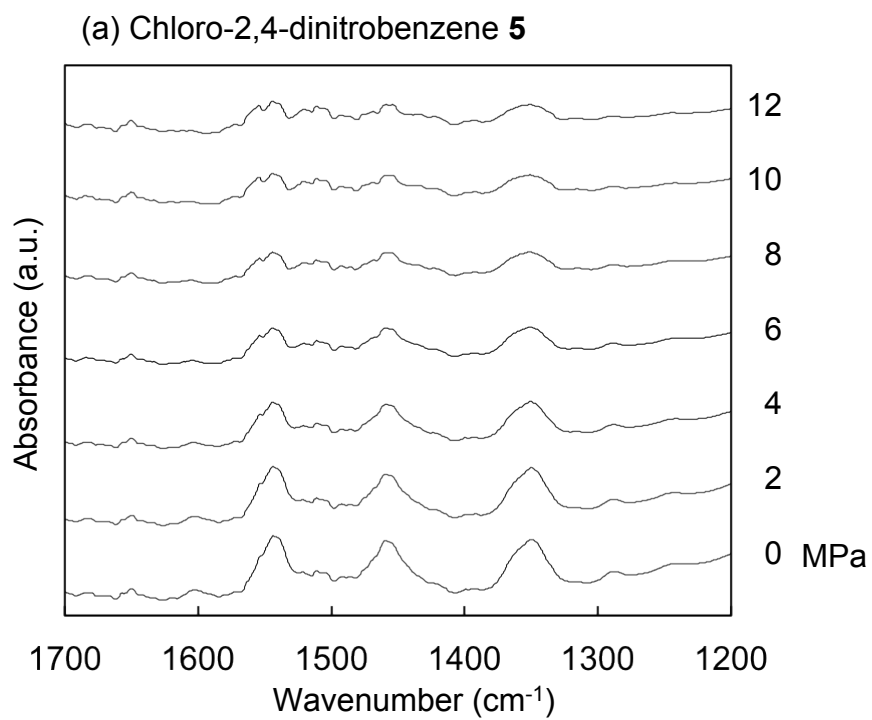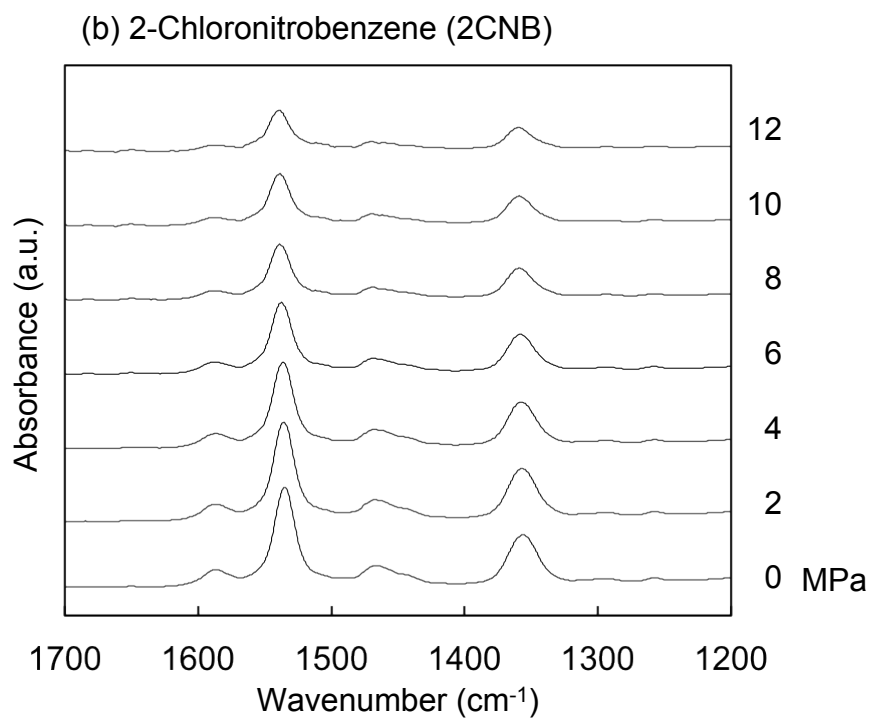

(Figure S2 on pp. 2 & 3)

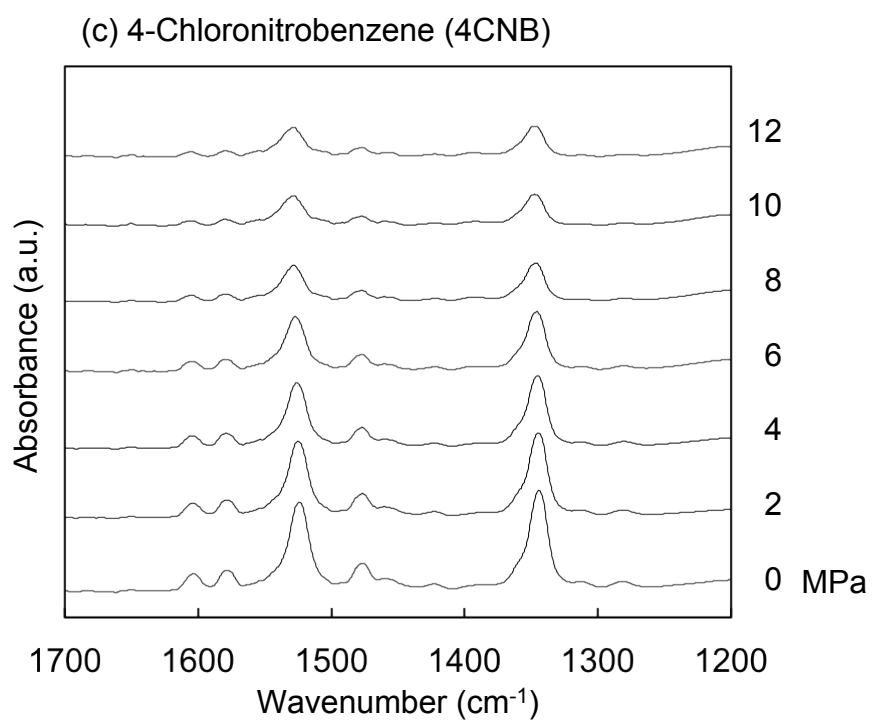

**Figure S2.** High-pressure FTIR spectra in the range of  $\nu(\text{NO}_2)$  for (a) **5**, (b) 2-chloronitrobenzene (2CNB) and (c) 4-chloronitrobenzene (4CNB) dissolved in THF measured in ATR mode at 323 K at 4 MPa of  $\text{H}_2$  and different  $\text{CO}_2$  pressures given.

(a) Chloro-2,4-dinitrobenzene **5**

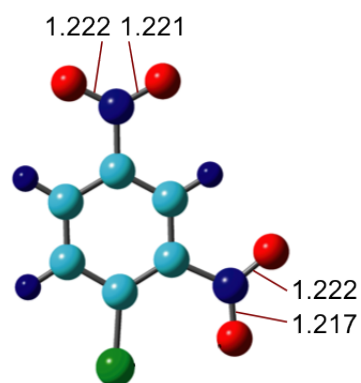

(b) Cluster of **5** with five CO<sub>2</sub>

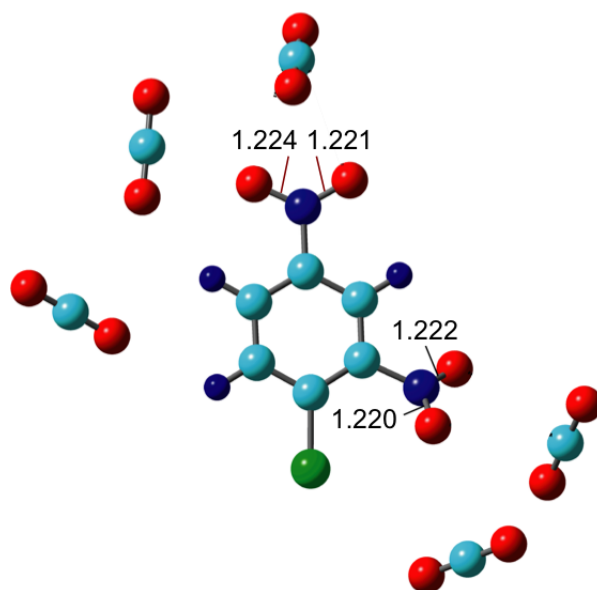

**Figure S3.** The optimized structures of **5** (a) and CO<sub>2</sub>-coordinated clusters of **5** with five CO<sub>2</sub> molecules. The bonding distances of NO of nitro groups are given in Å.
